# Supplementary material
Source: publisher figshare collection journal article supplement (https://acs.figshare.com/ndownloader/files/3843061)
Supplement: Supplementary file 1 [file 3843061]

# Supporting Information

## Biodegradable Elastomers and Silicon Nanomembranes/Nanoribbons for Stretchable, Transient electronics, and Biosensors

*Suk-Won Hwang,<sup>†</sup> Chi Hwan Lee,<sup>‡</sup> Huanyu Cheng,<sup>§</sup> Jae-Woong Jeong,<sup>||</sup> Seung-Kyun Kang,<sup>‡</sup> Jae-Hwan Kim,<sup>‡</sup> Jiho Shin,<sup>⊥</sup> Jian Yang,<sup>#</sup> Zhuangjian Liu,<sup>∇</sup> Guillermo A. Ameer,<sup>#</sup> Yonggang Huang,<sup>§</sup> and John A. Rogers<sup>\*,‡,⊙,◆</sup>*

<sup>†</sup>KU-KIST Graduate School of Converging Science and Technology, Korea University, Seoul 136-701, Korea

<sup>‡</sup>Department of Materials Science and Engineering, Frederick Seitz Materials Research Laboratory, University of Illinois at Urbana–Champaign, Urbana, Illinois 61801, United States

<sup>§</sup>Department of Mechanical Engineering, Civil and Environmental Engineering, Center for Engineering and Health, and Skin Disease Research Center, Northwestern University, Evanston, Illinois 60208, United States

<sup>||</sup>Department of Electrical, Computer, and Energy Engineering, University of Colorado, Boulder, Colorado 80309, United States

<sup>‡</sup>Department of Chemical and Biomolecular Engineering, University of Illinois at Urbana–Champaign, Urbana, Illinois 61801, United States

<sup>#</sup>Department of Biomedical Engineering, Northwestern University, Evanston, Illinois 60208, United States

<sup>∇</sup>Institute of High Performance Computing, 1 Fusionopolis Way, #16-16 Connexis, Singapore 138632, Singapore.

<sup>°</sup>Beckman Institute for Advanced Science and Technology, University of Illinois at Urbana–Champaign, Urbana, Illinois 61801, United States

<sup>◆</sup>Department of Chemistry, Mechanical Science and Engineering, Electrical and Computer Engineering, University of Illinois at Urbana–Champaign, Urbana, Illinois 61801, United States

**KEYWORDS:** Stretchable, flexible, transient, biodegradable electronics, biosensors

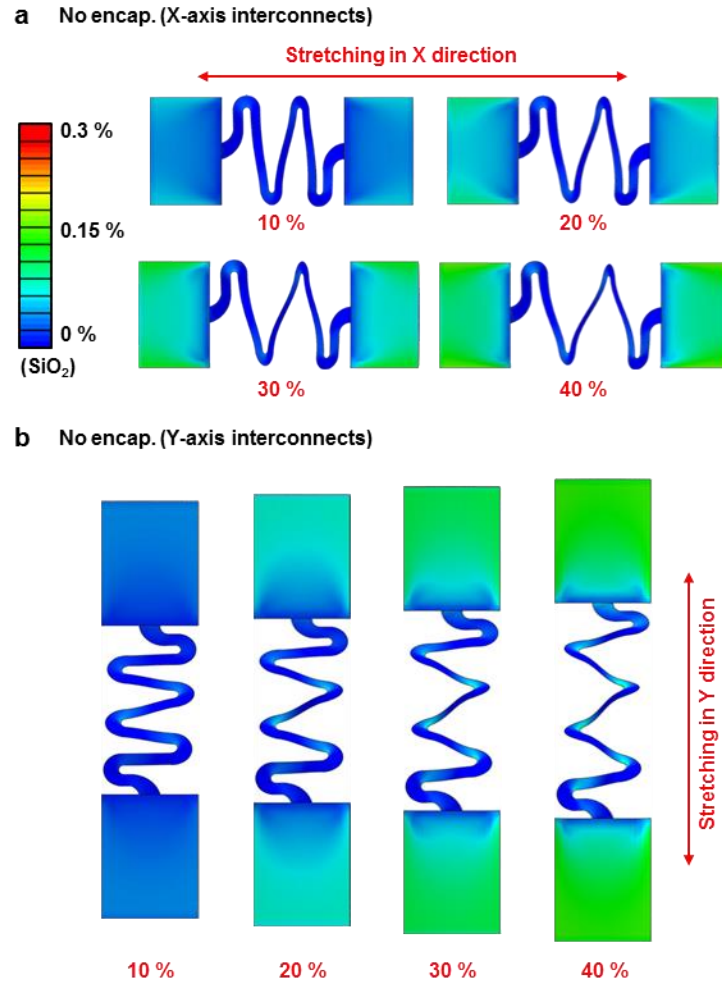

**Figure S1.** FEA results for a CMOS inverter with a serpentine structure for cases of tensile strain in the (a) x direction, and (b) y direction.

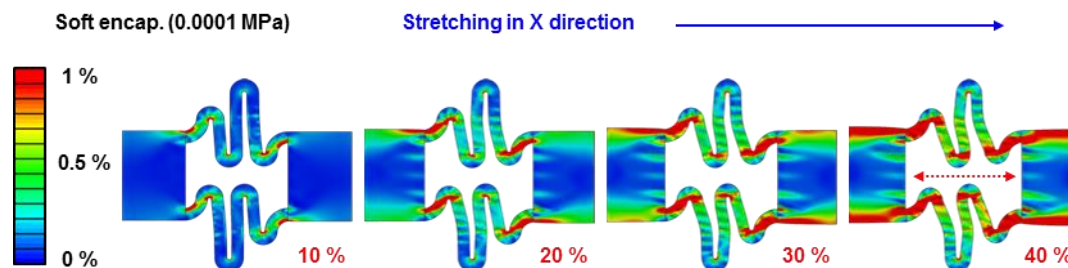

**Figure S2.** Maximum principal strain distributions determined by FEA for a CMOS inverter with soft encapsulation (0.0001 MPa) for stretching up to 40 %.

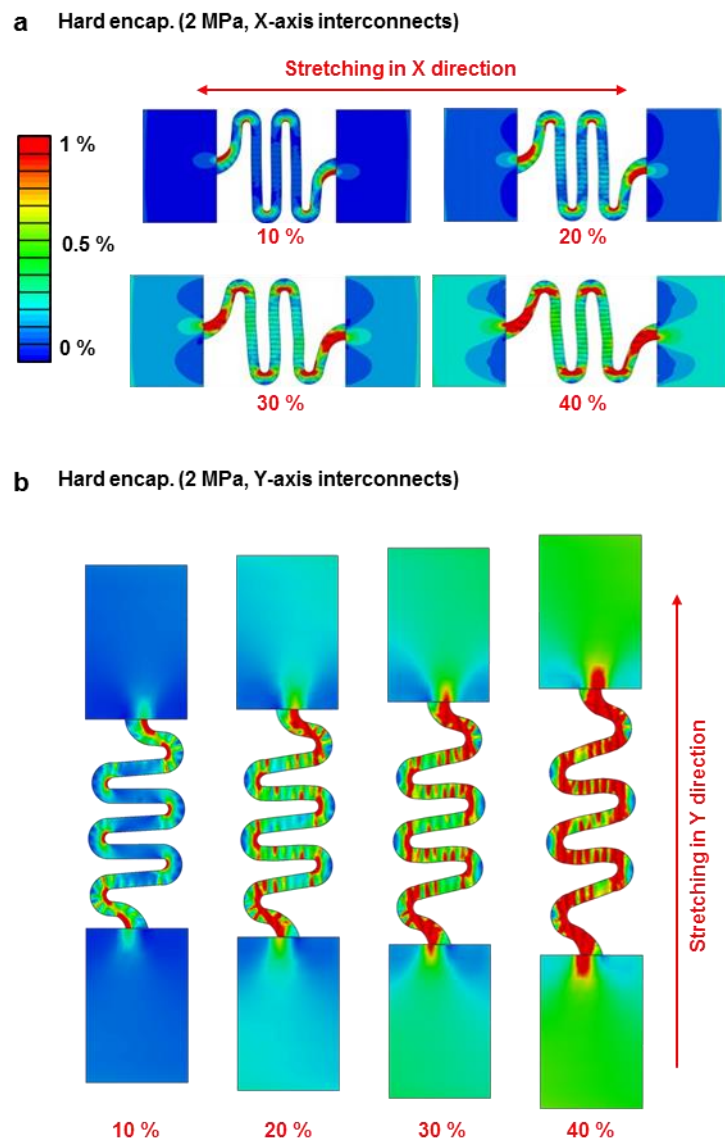

**Figure S3.** Maximum principal strain distributions determined by FEA for a CMOS device with hard encapsulation (2 MPa) for stretching in the (a) x direction and (b) y direction.

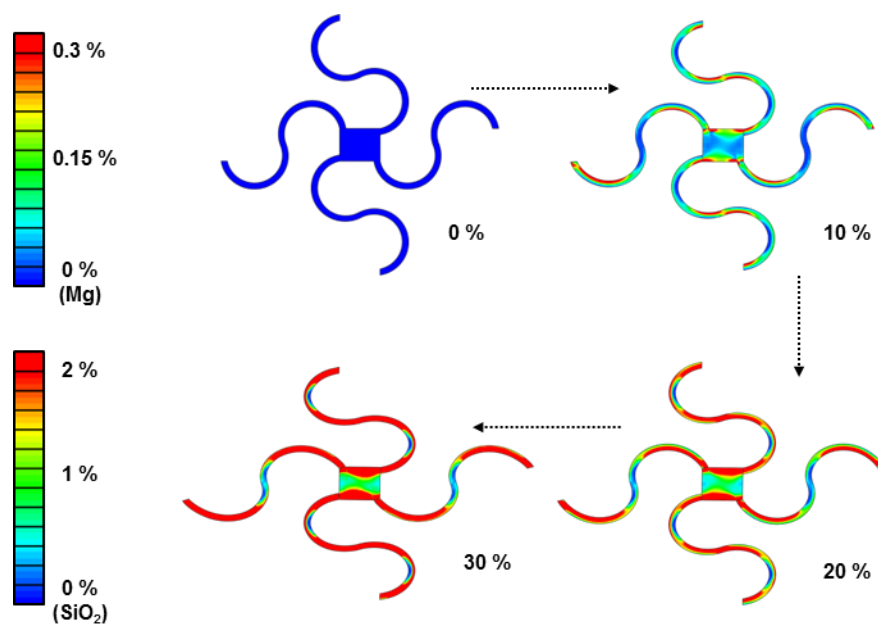

**Figure S4.** FEA results for a CMOS inverter with FS structure under tensile loading up to 30 %.

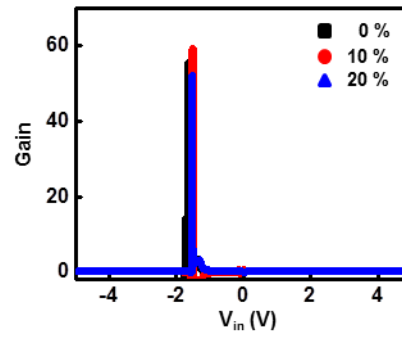

**Figure S5.** The measured gains of a typical CMOS inverter while applying strain up to 20 % (black, 0 %; red, 10 %; blue, 20 %).

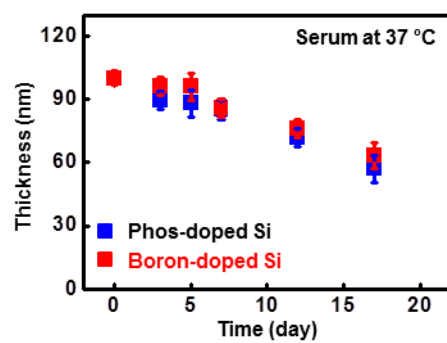

**Figure S6.** Changes in thickness of boron- (red) and phosphorous-doped (blue) Si while immersed in bovine serum at 37 °C.



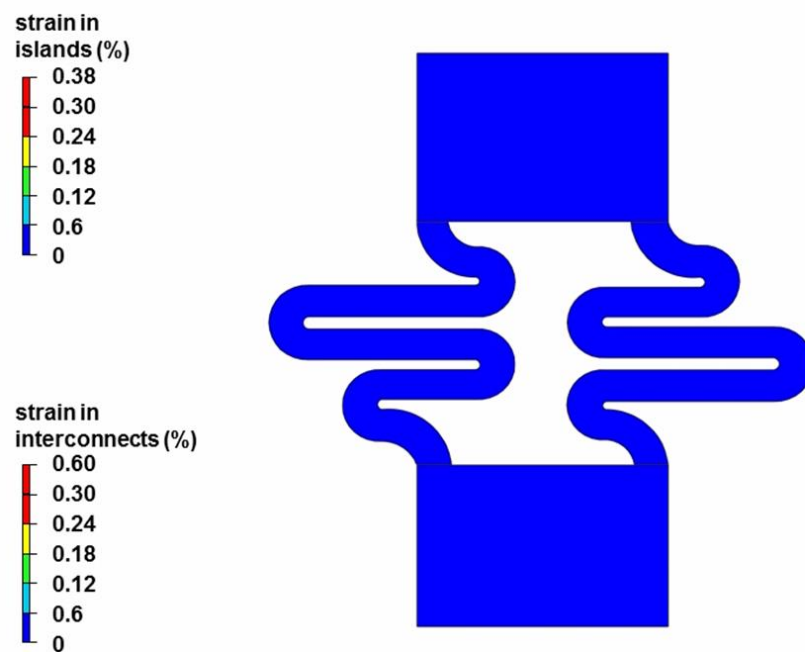

**Movie S1.** FEA results for stretching of a CMOS inverter with a typical serpentine structure without encapsulation.

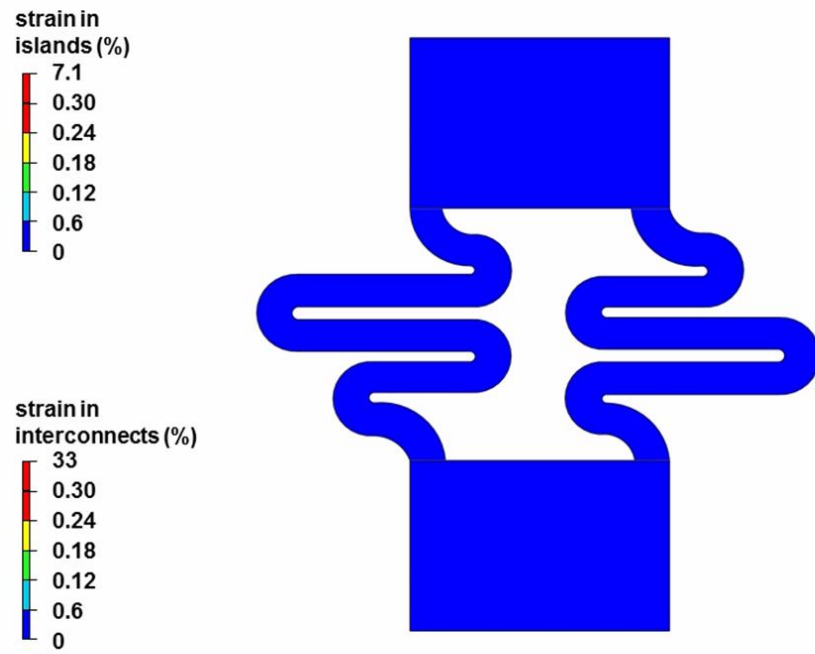

**Movie S2.** FEA results for stretching of CMOS inverter with a typical serpentine structure, with hard encapsulation.

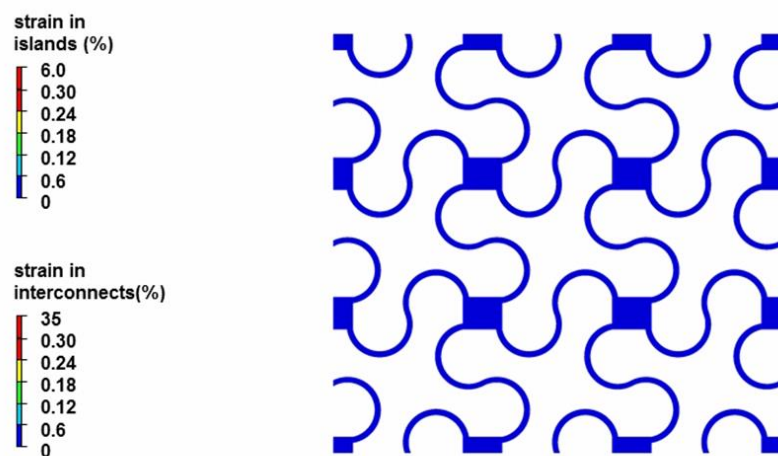

**Movie S3.** FEA results for stretching of CMOS inverter with filamentary serpentine structure, with hard encapsulation.
